# Supplementary material for: Anthricin Isolated fromAnthriscus sylvestris(L.) Hoffm. Inhibits the Growth of Breast Cancer Cells by Inhibiting Akt/mTOR Signaling, and Its Apoptotic Effects Are Enhanced by Autophagy Inhibition
Source: Hindawi journal article supplement (doi:10.1155/2013/385219), 2013-01-01

(A)

Anthracin: - - + +  
RM: - + - +

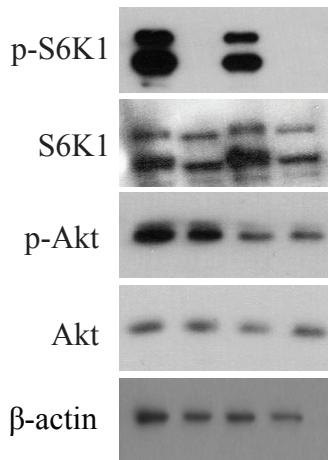

(B)

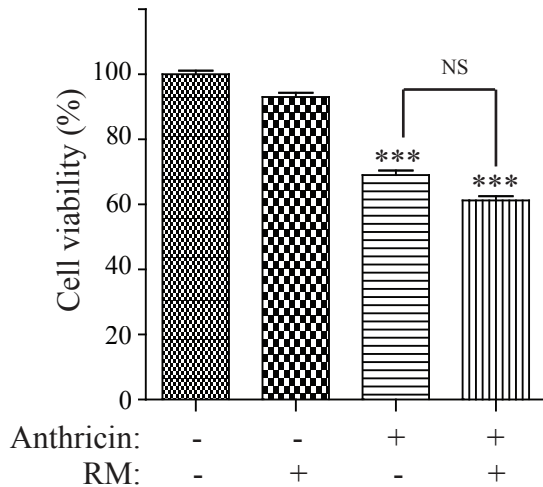

Supplement: f1 [file 385219.f1.pdf]
